# Supplementary material for: Thrombospondin-1: An Islet Endothelial Cell Signal of Importance for β-Cell Function
Source: PubMed Central journal article supplement — Diabetes. 2011 Jun 20;60(7):1946–54. doi: 10.2337/db10-0277 (PMC3121439; doi:10.2337/db10-0277), 2011-06-20

SUPPLEMENTARY DATA

**Supplementary Figure 1.** Transmission electron microscopical images of beta-cells in wild-type (A-B) and TSP-1 (-/-) mice (C-D) showing normal mitochondrial and endoplasmic reticulum ultrastructure. Images B and D are magnifications of ultrastructures within the marked field in A and C, respectively. Scale bars in A and C are 1  $\mu$ m, and in B and D 0.5  $\mu$ m.

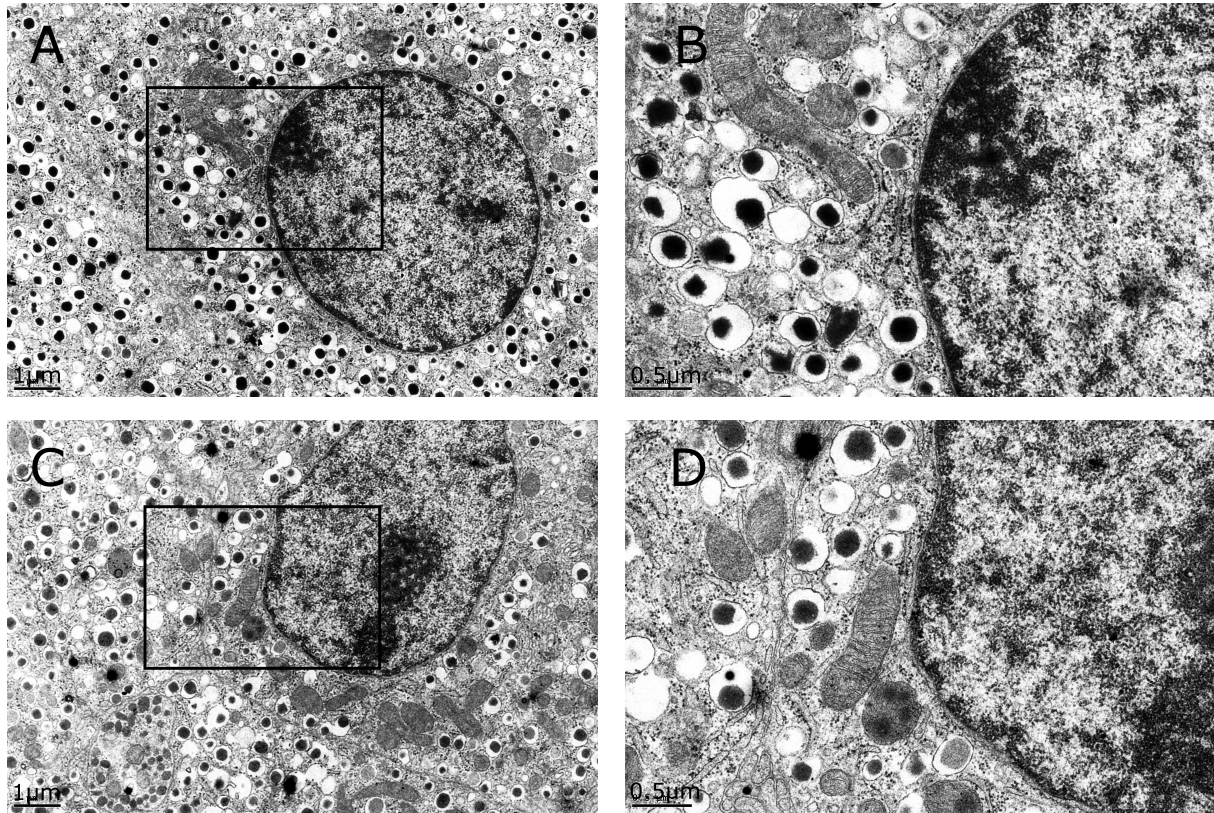

SUPPLEMENTARY DATA

**Supplemental Figure 2.** Effects of high glucose on dichlorofluorescein-diacetate (DCFH-DA) fluorescence in wild-type or TSP-1 (-/-) islets in the presence or absence of 100  $\mu\text{mol/L}$   $\text{H}_2\text{O}_2$  (n=6 animals in each group). \* denotes  $P < 0.05$ .

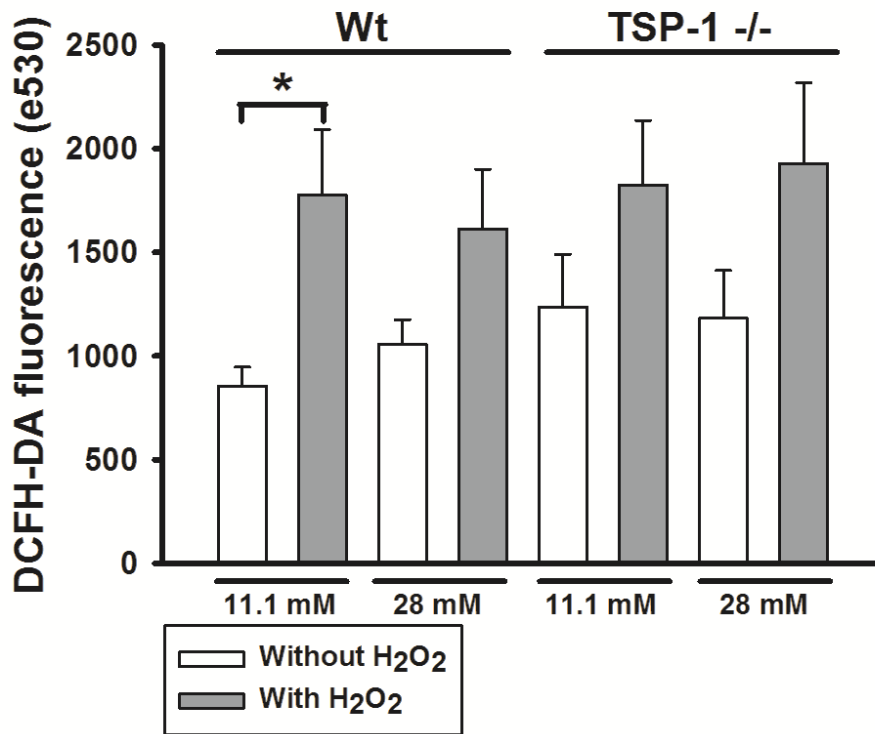

**Supplemental Figure 3.** Encapsulated neonatal islets implanted intraperitoneally and retrieved two months posttransplantation. Blood vessels were stained with *Bandeiraea Simplicifolia* (red). Sections were counterstained for hematoxylin. Scale bar 50  $\mu\text{m}$

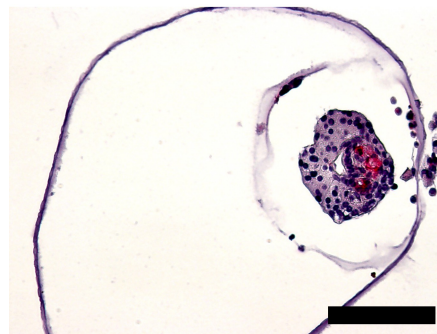

Supplement: supp_db10-0277_DB100277SupplementaryData.pdf [file supp_db10-0277_DB100277SupplementaryData.pdf]
